# Supplementary material for: Dynamic visual attention characteristics and their relationship to match performance in skilled basketball players
Source: PeerJ. 2020 Aug 19;8:e9803. doi: 10.7717/peerj.9803 (PMC7443082; doi:10.7717/peerj.9803)
Supplement: Supplemental Information 1 — All performance statistical data were obtained from the official website of China University Basketball League. Five statistics were selected for match performance, including points scored, steals, assists, turnovers, and fouls. [file peerj-08-9803-s001.xlsx]

## Sheet: Sheet1
player	score	assist	steal	turnover	foul
1	59	4.1	2.6	9.7	5.6
2	41.7	13	4.3	10.4	6.9
3	44	7.7	6.6	8.9	9.5
4	15.1	4.1	2.4	4.1	7.1
5	26	6.7	1.3	6.7	9.4
6	19.5	10.6	5.7	7.3	18.7
7	41	4.1	6	14	17.4
8	27	13.4	4	9.3	9.3
9	47.6	2.7	3.6	3.6	7.2
10	32.5	6.1	3.6	7.6	8.6
11	39.7	6.1	3.1	10.7	6.9
12	26.5	8.5	10.2	18.8	8.5
13	13.2	1.4	3.5	6.9	17.3
14	31.3	5.5	3.1	5.5	10.1
15	37.2	7.5	5.86	5.3	7.9
16	50.3	9.6	4.8	8.9	6.6
17	47.9	10.2	7.1	12.2	4.1
18	42.6	11.3	8.3	6.2	6.1
19	38.9	6.4	4.3	8.9	9.6
20	25.8	7.5	3.5	9.2	11.3
21	19.4	9.5	5.6	5.9	9.5
22	22.6	5.4	4.5	4.6	12.5
23	43.1	11.6	6.2	6.7	8.6
24	24.4	2.7	2.1	8.1	13.7
