# Supplementary material for: Dynamic visual attention characteristics and their relationship to match performance in skilled basketball players
Source: PeerJ. 2020 Aug 19;8:e9803. doi: 10.7717/peerj.9803 (PMC7443082; doi:10.7717/peerj.9803)
Supplement: Supplemental Information 3 — The data includes tracking 2 targets, 3 targets, 4 targets, 5 targets and 6 targets. [file peerj-08-9803-s003.xlsx]

## Sheet: Sheet1
	groups	5°/s	10°/s	15°/s
1	baskeball player	0.6	0.43	0.17
2	baskeball player	0.93	0.63	0.47
3	baskeball player	0.9	0.63	0.43
4	baskeball player	0.83	0.53	0.2
5	baskeball player	0.67	0.53	0.13
6	baskeball player	0.9	0.63	0.63
7	baskeball player	0.87	0.67	0.47
8	baskeball player	0.8	0.77	0.4
9	baskeball player	0.6	0.47	0.23
10	baskeball player	0.83	0.63	0.43
11	baskeball player	0.9	0.53	0.23
12	baskeball player	0.83	0.67	0.47
13	baskeball player	0.9	0.53	0.23
14	baskeball player	0.8	0.7	0.27
15	baskeball player	1	0.8	0.5
16	baskeball player	0.93	0.73	0.37
17	baskeball player	0.9	0.8	0.43
18	baskeball player	0.83	0.77	0.43
19	baskeball player	0.77	0.6	0.47
20	baskeball player	0.73	0.43	0.27
21	baskeball player	0.43	0.47	0.3
22	baskeball player	0.73	0.73	0.43
23	baskeball player	0.7	0.73	0.47
24	baskeball player	0.5	0.27	0.2
1	college students	0.77	0.53	0.13
2	college students	0.9	0.57	0.23
3	college students	0.77	0.57	0.4
4	college students	0.77	0.53	0.37
5	college students	0.93	0.63	0.23
6	college students	0.83	0.5	0.17
7	college students	0.9	0.5	0.27
8	college students	0.73	0.27	0.13
9	college students	0.83	0.57	0.4
10	college students	0.93	0.4	0.17
11	college students	0.9	0.57	0.4
12	college students	0.77	0.6	0.43
13	college students	0.73	0.4	0.17
14	college students	0.67	0.3	0.27
15	college students	0.73	0.5	0.23
16	college students	0.83	0.3	0.23
17	college students	0.77	0.4	0.27
18	college students	0.9	0.57	0.2
19	college students	0.83	0.33	0.13
20	college students	0.83	0.23	0.07
21	college students	0.67	0.33	0.17
22	college students	0.77	0.3	0.1
23	college students	0.8	0.33	0.07
24	college students	0.83	0.33	0.27
